# Supplementary material for: SCAN1-TDP1 trapping on mitochondrial DNA promotes mitochondrial dysfunction and mitophagy
Source: PubMed Central journal article supplement — Sci Adv. 2019 Nov 6;5(11):eaax9778. doi: 10.1126/sciadv.aax9778 (PMC6834389; doi:10.1126/sciadv.aax9778), 2019-11-06
Supplement: aax9778_SM.pdf [file aax9778_SM.pdf]

## Supplementary Materials for

### **SCAN1-TDP1 trapping on mitochondrial DNA promotes mitochondrial dysfunction and mitophagy**

Arijit Ghosh, Sangheeta Bhattacharjee, Srijita Paul Chowdhuri, Abhik Mallick, Ishita Rehman, Sudipta Basu, Benu Brata Das\*

\*Corresponding author. Email: pcbbd@iacs.res.in

Published 6 November 2019, *Sci. Adv.* **5**, eaax9778 (2019)  
DOI: 10.1126/sciadv.aax9778

#### **This PDF file includes:**

Fig. S1. Mito-SN38 does not trap nuclear-Top1cc but impairs mitochondrial metabolism through SCAN1-TDP1 trapping in the mitochondria.

Fig. S2. Differentiation of SH-SY5Y cells showing expression of FLAG-TDP1 and lysosomal localization of SCAN1 mitochondria showing mitophagy.

Table S1. List of primers used.

## Supplementary Figures

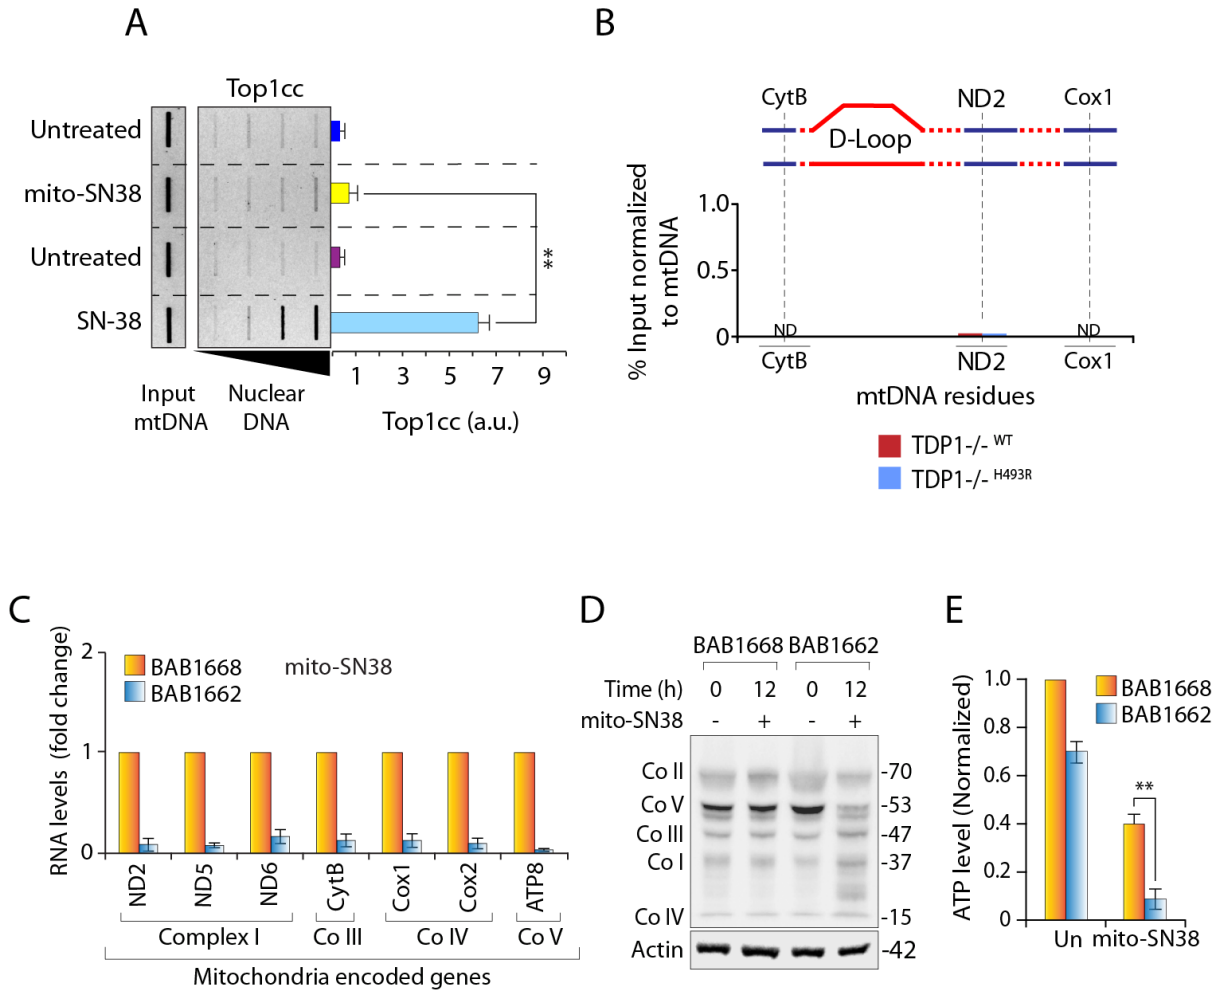

**Fig. S1. Mito-SN38 does not trap nuclear-Top1cc but impairs mitochondrial metabolism through SCAN1-TDP1 trapping in the mitochondria.** (A) Nuclear Top1cc was detected by ICE bioassay with nuclear Top1 specific antibody after treated with mito-SN38 (5  $\mu$ M, 3 h) or SN-38 (1  $\mu$ M, 3 h). Total DNA at increasing concentrations (0.5, 1, 2 and 4  $\mu$ g) was immunoblotted with an anti-nuclear Top1 specific antibody. The DNA input was probed with anti-dsDNA antibody. Densitometry analysis of trapped Top1 band intensity were quantified and expressed as fold increase relative to DNA input. (Error bar: mean values  $\pm$  SEM). Asterisks denote statistically significant difference (\*\*P<0.01; t-test) (B) Detection of TDP1<sup>H493R</sup>-trapping

sites on mtDNA by chromatin immunoprecipitation (ChIP) followed by mtDNA specific qPCR analysis. FLAG-TDP1-DNA adducts was immunoprecipitated with anti-FLAG antibody in indicated cells after treatment with mito-SN38 treatment (5  $\mu$ M, 3 h), and the putative TDP1-binding site was quantified by qPCR. The mtDNA copy numbers of each cell line were concomitantly measured using primers for the mitochondrial (ND2, Cox1 and CytB) and nuclear (B2M) genes. Enrichment of TDP1-bound mtDNA is expressed as percent input, which is then normalized to the mtDNA copy number of the cell line. Data represents the mean  $\pm$  standard error of independent experiments. (C) Gene expression profile of mitochondria-encoded ND2, ND5, ND6, CytB, Cox1, Cox2 and ATP8 by RT-PCR in SCAN1 patient derived lymphoblastoid cell lines (BAB1662) and their wild type counterpart (BAB1668) after treatment with mito-SN38 (5  $\mu$ M, 6 h). Data represents the mean  $\pm$  standard error of three independent experiments. (D) Representative western blot of nuclear-encoded OXPHOS subunits in indicated cells before and after treatment with mito-SN38 (5  $\mu$ M, 12 h). Actin is shown as the loading control. (E) ATP level estimation in BAB1668 and BAB1662 cells treated with or without mito-SN38 (5  $\mu$ M, 6 h). Data represents the mean  $\pm$  standard error of three independent experiments. Asterisks denote statistically significant difference (\*\*P<0.01; t-test).

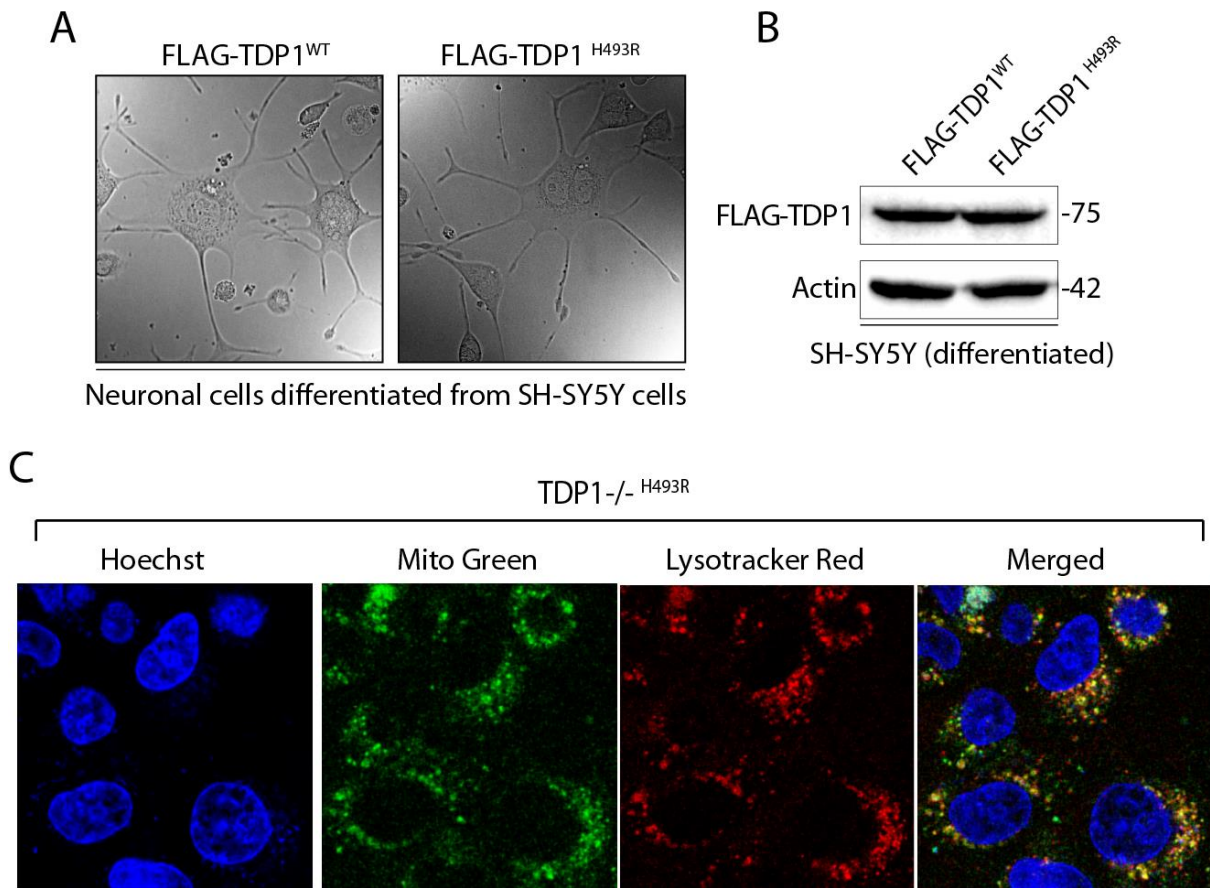

**Fig. S2. Differentiation of SH-SY5Y cells showing expression of FLAG-TDP1 and lysosomal localization of SCAN1 mitochondria showing mitophagy.** (A) Representative images of retinoic acid induced differentiated neuronal cells from human neuroblastoma (SH-SY5Y) cells transfected with lentiviral constructs FLAG-TDP1<sup>WT</sup> or FLAG-TDP1<sup>H493R</sup> under live cell confocal microscopy. (B) Western blot analysis of FLAG-TDP1 in whole cell lysates obtained from differentiated neuronal cell expressing FLAG-TDP1<sup>WT</sup> or FLAG-TDP1<sup>H493R</sup> detected with anti-FLAG antibody. Actin served as the loading control. (C) Representative images of TDP1<sup>-/-</sup>H493R MEFs treated with mito-SN38 (2.5 μM, 24 h) analysed under live cell microscopy. The green fluorescence signal of MitoTracker green denote mitochondrial network;

red fluorescence signal of LysoTracker red denote lysosomal vesicles and the yellow fluorescence signal denote colocalization of mitochondria with lysosomes (merged image) .

**Table S1. List of primers used.**

**List of primers used in Real Time PCR**

| Gene Name | Species | 5'-Forward Primer        | 5'-Reverse Primer        |
|-----------|---------|--------------------------|--------------------------|
| ACTINrt   | Human   | GACCCAGATCATGTTTGAGACC   | CATCACGATGCCAGTGGTAC     |
| ATP8rt    | Human   | ACCGTATGGCCCACCATAATTACC | TTTATGGGCTTTGGTGAGGGAGGT |
| ND2rt     | Human   | ACTGCGCTAAGCTCGCACTG     | ATTATGGATGCGGTTGCTTG     |
| ND5rt     | Human   | GGTTTCATCCTCGCCTTAGC     | ACCTAATTGGGCTGATTTGC     |
| ND6rt     | Human   | AGGATTGGTGCTGTGGGTGAAAGA | ATAGGATCCTCCCGAATCAACCCT |
| Cox1rt    | Human   | ACCCTAGACCAAACCTACGC     | TAGGCCGAGAAAGTGTGTG      |
| Cox2rt    | Human   | ACAGATGCAATTCGCGGACG     | GGCATGAAACTGTGGTTTGC     |
| CytBr     | Human   | CTCCCGTGAGGCCAAATATC     | GAATCGTGTGAGGGTGGGAC     |
| TFAMrt    | Human   | GACTTCTGCCAGCATAATAC     | GAGTTCCTGCCTGCTTTATG     |
| NRF1rt    | Human   | GGAGTGATGTCCGCACAGAA     | CGCTGTAAAGCGCCATAGTG     |
| PGC1rt    | Human   | GTCACCACCCAAATCCTTAT     | ATCTACTGCCTGGAGACCTT     |

**List of primers used in ChIP analyses**

| Gene Name                                  | Species | 5'-Forward Primer      | 5'-Reverse Primer       |
|--------------------------------------------|---------|------------------------|-------------------------|
| B2M                                        | Mouse   | GCTACGTAACACAGTTCC     | GTGAGCCAGGATATAGAAAG    |
| MTNCR15420                                 | Mouse   | CCAAAGCTGGTATTCTA      | TATGACCTGAACCATTG       |
| MTNCR15690                                 | Mouse   | CTTCCATATGACTATCCC     | CCTGAAGTAAGAACCAG       |
| MTNCR16060                                 | Mouse   | CTACGGTGAAGAATCATTAG   | GTTTGGCATTAAAGAGGAG     |
| MT Heavy & Light Strand Promoter (HSP-LSP) | Mouse   | CTCCTCTTAATGCCAAAC     | GAATTGATCAGGACATAGG     |
| CYTBr                                      | Mouse   | ATTCCTTCATGTCGGACGAG   | ACTGAGAAGCCCCCTCAAAT    |
| Cox1rt                                     | Mouse   | TTTTCAGGCTTACCCTAGATGA | CCTACGAATATGATGGCGAAGTG |
| ND2rt                                      | Mouse   | CCATTCCAATTCTGATTACC   | GTCATGTAAGAAGAATAAGTCC  |

**List of primers used in Long Range PCR**

| Gene Name | Species | 5'-Forward Primer          | 5'-Reverse Primer          |
|-----------|---------|----------------------------|----------------------------|
| LRMT      | Mouse   | GCCAGCCTGACCCATAGCCATAATAT | GAGAGATTTTATGGGTGTAATGCGG  |
| SRMT      | Mouse   | CCCAGCTACTACCATCATTCAAGT   | GATGGTTTGGGAGATTGGTTGATGT  |
| LRMT      | Human   | TTTCATCATGCGGAGATGTTGGATGG | TCTAAGCCTCCTTATTTCGAGCCGA  |
| SRMT      | Human   | CCCACAAACCCCACTACTAAACCCAC | TTTCATCATGCGGAGATGTTGGATGG |

**List of primers used in Site Directed Mutagenesis**

| Gene Name  | Species | 5'-Forward Primer                           | 5'-Reverse Primer                           |
|------------|---------|---------------------------------------------|---------------------------------------------|
| TDP1 H493R | Human   | CGCAGCAATGCCATGCCACGTATTAA<br>GACATATATGAGG | CCTCATATATGTCTTAATACGTGGCA<br>TGGCATTGCTGCG |
| TDP1 C-Ter | Human   | GGAGAAGAATTCATGATCAAGGATA<br>TTTTATCTCC     | GGAGAAGGATCCCGGAGGGCACCCA<br>CATGTTG        |
